# Supplementary material for: ER Quality Control Components UGGT and STT3a Are Required for Activation of Defense Responses in Bir1-1
Source: PubMed Central journal article supplement (PMC4361565; doi:10.1371/journal.pone.0120245), 2015-03-16
Supplement: pone.0120245.s001.pdf [file pone.0120245.s001.pdf]

**Table S1. Sequences of markers used in this project.**

| <b>Marker name</b> | <b>Position (MB)</b> | <b>Polymorphism type</b> | <b>Primer 1</b>          | <b>Primer 2</b>         |
|--------------------|----------------------|--------------------------|--------------------------|-------------------------|
| T2E12              | Chr.1-25.66          | Indel                    | F: tgggttataatcatgaagc   | R: gtgtccattttggtacttag |
| F23N20             | Chr.1-26.84          | Indel                    | F: tctgagtagttgtgcgac    | R: attgggtagtatccattatg |
| F26A9              | Chr.1-26.91          | Indel                    | F: gaatatcgttggctataagg  | R: tgcacccatcagaggagttc |
| T8K14              | Chr.1-29.87          | Indel                    | F: gacaagaacctcataccttgc | R: caagtgatggagaagctgtc |
